# Supplementary material for: Salinity undermines biocontrol: A tri-trophic assessment of plant signaling and parasitoid fitness under salinity stress
Source: Research Square preprint supplement (doi:10.21203/rs.3.rs-8129438/v1), 2025-12-04
Supplement: Supplementary file 1 [file a1cfad15da6322861019e278.docx]

**Supplementary Materials**

**Supplementary Table S1**: Summary of the nine volatile organic compounds (VOCs) emitted by herbivore damaged plants under no salt and salt conditions. Values represent the mean ± SEM of compound emissions (ng) for No Salt Herbivory and Salt Herbivory treatments. Chi square were derived from Anova (Type 2) of quasiPoisson generalized linear models (GLMs) comparing emission rates between treatments. Positive estimates indicate higher emissions under salt herbivory, while negative estimates indicate suppression. Significance was assessed using P-values from the GLMs (*P* < 0.05 considered significant, indicated with asterisks).

| **No.** | **Compound** | **Chi-square** | **P-value** | **No Salt Herbivory (ng, mean ± SE)** | **Salt Herbivory (ng, mean ± SE)** | |
| --- | --- | --- | --- | --- | --- | --- |
| 1 | Copaene Alpha | 160.8063 | <0.0001* | 2.436 ± 0.349 | 0.000 ± 0.000 |
| 2 | Oxime , Methoxy Phenyl | 17.0256 | 0.0008* | 1.517 ± 0.668 | 0.000 ± 0.000 |
| 3 | TMTT | 16.8385 | 0.0008* | 65.628 ± 16.225 | 16.087 ± 2.389 |
| 4 | Hexenol 3e | 16.5822 | 0.0008* | 0.848 ± 0.415 | 8.362 ± 2.194 |
| 5 | Eucarvone | 7.8582 | 0.0681 | 0.000 ± 0.000 | 0.678 ± 0.369 |
| 6 | Geranyl Acetone | 7.5728 | 0.0681 | 0.000 ± 0.000 | 0.618 ± 0.343 |
| 7 | Muurolene Alpha | 7.0451 | 0.0686 | 0.000 ± 0.000 | 0.229 ± 0.132 |
| 8 | Elemene Gamma | 6.5604 | 0.0758 | 0.238 ± 0.169 | 0.000 ± 0.000 |
| 9 | Hexenal 3z | 6.4674 | 0.0758 | 0.000 ± 0.000 | 1.489 ± 0.894 |
| 10 | Indole | 5.412 | 0.1254 | 3.043 ± 1.107 | 0.820 ± 0.338 |
| 11 | Linalool | 5.1157 | 0.1266 | 0.000 ± 0.000 | 0.626 ± 0.423 |
| 12 | Nonane N | 4.8834 | 0.1266 | 0.000 ± 0.000 | 1.216 ± 0.840 |
| 13 | P Cumenol | 4.8728 | 0.1266 | 0.000 ± 0.000 | 0.114 ± 0.079 |
| 14 | Nerolidol Z | 4.8573 | 0.1266 | 0.000 ± 0.000 | 0.207 ± 0.143 |
| 15 | 4 Oxohex 2 Enal | 4.7199 | 0.1286 | 0.000 ± 0.000 | 0.735 ± 0.517 |
| 16 | D Elemene | 4.5234 | 0.1357 | 0.000 ± 0.000 | 0.210 ± 0.151 |
| 17 | Hexenol 3z | 4.3828 | 0.1392 | 0.000 ± 0.000 | 0.953 ± 0.695 |
| 18 | Viridiflorene | 4.221 | 0.1427 | 0.386 ± 0.166 | 0.073 ± 0.057 |
| 19 | Selina 3,7(11) Diene | 4.1616 | 0.1427 | 0.000 ± 0.000 | 0.137 ± 0.103 |
| 20 | 4,8,12 Trimethyl 1,3(Z),7(E),11 Tridecatetraene (Ej Ren) | 3.3036 | 0.1823 | 0.092 ± 0.092 | 0.000 ± 0.000 |
| 21 | Nonanal | 3.3036 | 0.1823 | 0.594 ± 0.594 | 0.000 ± 0.000 |
| 22 | Cumenol O | 3.3036 | 0.1823 | 0.075 ± 0.075 | 0.000 ± 0.000 |
| 23 | Gurjunene Gamma | 3.3036 | 0.1823 | 0.025 ± 0.025 | 0.000 ± 0.000 |
| 24 | Cumenol M | 3.3036 | 0.1823 | 0.059 ± 0.059 | 0.000 ± 0.000 |
| 25 | P Cymene | 3.3036 | 0.1823 | 0.151 ± 0.151 | 0.000 ± 0.000 |
| 26 | O Cymene | 3.2519 | 0.1823 | 6.182 ± 2.729 | 1.702 ± 0.973 |
| 27 | Caryophyllene | 2.9566 | 0.2108 | 7.782 ± 6.463 | 0.631 ± 0.419 |
| 28 | Nonanoic Acid | 2.8477 | 0.2146 | 2.979 ± 0.914 | 1.229 ± 0.555 |
| 29 | Guaiadiene 6,9 | 2.8027 | 0.2146 | 2.364 ± 0.511 | 1.146 ± 0.462 |
| 30 | Caryophyllene Oxide | 2.764 | 0.2146 | 1.799 ± 0.614 | 0.749 ± 0.306 |
| 31 | Ocimene (E) Beta | 2.5844 | 0.2327 | 15.361 ± 2.063 | 21.238 ± 3.006 |
| 32 | Pinene Beta | 2.4817 | 0.2408 | 2.191 ± 0.509 | 1.083 ± 0.442 |
| 33 | Thujene Alpha | 2.3322 | 0.2498 | 0.000 ± 0.000 | 0.186 ± 0.186 |
| 34 | Phellandrene Beta | 2.3322 | 0.2498 | 0.000 ± 0.000 | 11.574 ± 11.574 |
| 35 | Jasmone Z | 2.267 | 0.2523 | 0.310 ± 0.156 | 0.069 ± 0.069 |
| 36 | Humulene Alpha | 1.8153 | 0.323 | 7.335 ± 1.664 | 4.895 ± 0.956 |
| 37 | Cymene Ortho | 1.5303 | 0.3823 | 22.926 ± 5.637 | 43.197 ± 16.184 |
| 38 | Elemene Beta | 1.3586 | 0.4205 | 1.098 ± 0.300 | 0.626 ± 0.259 |
| 39 | Terpinolene | 1.2752 | 0.4355 | 5.389 ± 1.048 | 8.020 ± 2.100 |
| 40 | Germacrene B | 0.6665 | 0.6622 | 0.232 ± 0.098 | 0.122 ± 0.086 |
| 41 | Sylvestrene Iso | 0.6612 | 0.6622 | 0.087 ± 0.087 | 0.211 ± 0.124 |
| 42 | Beta Myrcene | 0.644 | 0.6622 | 19.069 ± 4.746 | 14.408 ± 3.542 |
| 43 | Decanal N | 0.5334 | 0.7133 | 6.412 ± 1.171 | 7.596 ± 1.118 |
| 44 | B Elemene | 0.4814 | 0.7317 | 25.001 ± 5.817 | 20.348 ± 3.802 |
| 45 | Nonanal N | 0.4146 | 0.7602 | 10.261 ± 1.858 | 11.838 ± 1.604 |
| 46 | Decanal | 0.392 | 0.7602 | 0.730 ± 0.300 | 0.446 ± 0.311 |
| 47 | Cymene Para | 0.3758 | 0.7602 | 8.130 ± 4.464 | 5.289 ± 2.266 |
| 48 | P Cymene | 0.3029 | 0.8032 | 7.719 ± 4.276 | 4.922 ± 2.986 |
| 49 | Pinene Alpha | 0.2521 | 0.8329 | 47.453 ± 7.343 | 41.467 ± 8.934 |
| 50 | Dodecanal | 0.1923 | 0.8559 | 0.347 ± 0.240 | 0.511 ± 0.286 |
| 51 | Isoledene | 0.1818 | 0.8559 | 0.137 ± 0.080 | 0.090 ± 0.073 |
| 52 | Terpinene Gamma | 0.1511 | 0.875 | 6.149 ± 2.032 | 7.480 ± 2.714 |
| 53 | Methyl Salicylate | 0.1214 | 0.8795 | 1.361 ± 0.510 | 1.168 ± 0.278 |
| 54 | Germacrene D | 0.1183 | 0.8795 | 1.843 ± 0.526 | 1.600 ± 0.473 |
| 55 | Cumene | 0.0983 | 0.8795 | 7.162 ± 3.015 | 5.959 ± 2.438 |
| 56 | Sabinene | 0.0786 | 0.8795 | 687.928 ± 91.762 | 734.342 ± 133.336 |
| 57 | Elemene Delta | 0.0738 | 0.8795 | 6.086 ± 1.518 | 5.407 ± 1.891 |
| 58 | Isospathulenol | 0.0707 | 0.8795 | 3.536 ± 0.592 | 3.763 ± 0.608 |
| 59 | Geranyl Linalool E,E | 0.0481 | 0.9051 | 1.076 ± 0.576 | 0.920 ± 0.440 |
| 60 | Jasmone E | 0.0252 | 0.9423 | 0.536 ± 0.379 | 0.471 ± 0.202 |
| 61 | 1,7,7 Trimethyl 2 Vinylbicyclo[2 2 1]Hept 2 Ene | 0.0123 | 0.9509 | 0.332 ± 0.239 | 0.303 ± 0.142 |
| 62 | Phellandrene Alpha | 0.0109 | 0.9509 | 43.921 ± 9.999 | 41.818 ± 16.460 |
| 63 | Terpinene Alpha | 0.0093 | 0.9509 | 0.883 ± 0.484 | 0.816 ± 0.487 |
| 64 | Premnaspirodiene | 0.0023 | 0.9758 | 0.078 ± 0.078 | 0.083 ± 0.083 |
| 65 | Myrcene | 0.0001 | 0.9921 | 7.123 ± 2.483 | 7.091 ± 2.037 |


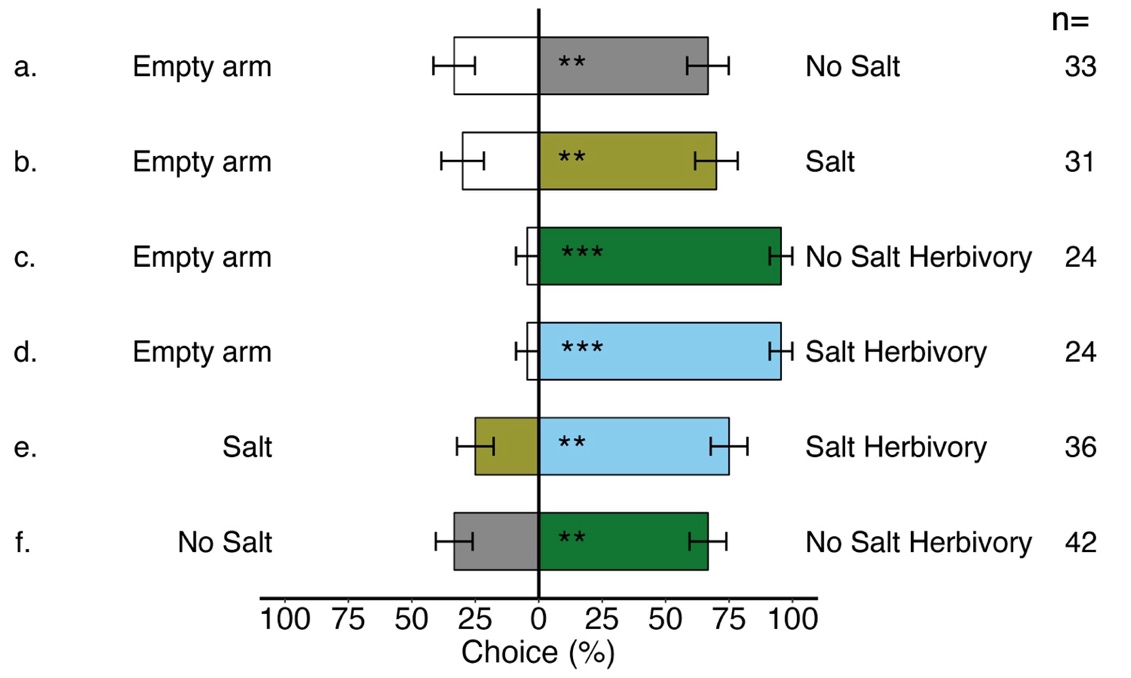


**Supplementary Fig. S1** The percentage of *M. croicepes* wasps choices in a Y-tube olfactometer experimental setup, with error bars representing the standard error of the mean. Significance levels: asterisks (** *P* < 0.001, *** *P* < 0.0001).
